# Supplementary material for: Birth mass is the key to understanding the negative correlation between lifespan and body size in dogs
Source: PubMed Central journal article supplement (PMC5270664; doi:10.18632/aging.101081), 2016-12-08
Supplement: aging-08-3209-s001.pdf [file aging-08-3209-s001.pdf]

## **SUPPLEMENTARY MATERIAL**

Please browse the links in Full Text version of this manuscript to see Supplementary Tables.

**Supplementary Table S1. The birth mass, adult mass, and lifespan of 90 breeds of male dogs.**

**Supplementary Table S2. The birth mass, adult mass, and lifespan of 90 breeds of female dogs.**
